# Supplementary material
Source: publisher site journal article supplement (https://www.dovepress.com/article/287720)
Supplement: Supplementary file 1 [file get_supplementary_file.php]

**Supporting Information**

**Biostable double-strand circular aptamers conjugated onto dendrimers for specific capture and inhibition of circulating leukemia cells**

Yu Li1, #, Ting Zhang3, #, Jing Huang1, Haiyan Dong*, 1, Jingjing Xie*, 2, Lee Jia 4

1 Fujian Key Laboratory for Translational Research in Cancer and Neurodegenerative Diseases, Institute for Translational Medicine, School of Basic Medical Sciences, Fujian Medical University, Fuzhou, Fujian 350122, China.

2 School of Pharmaceutical Sciences, and Fujian Provincial Key Laboratory of Innovative Drug Target Research, Xiamen University, Xiang'an South Road, Xiamen, Fujian 361102, China.

3 Cancer Metastasis Alert and Prevention Center, and Pharmaceutical Photocatalysis of State Key Laboratory of Photocatalysis on Energy and Environment, College of Chemistry; Fujian Provincial Key Laboratory of Cancer Metastasis Chemoprevention and Chemotherapy, Fuzhou University, Fuzhou 350002, China.

4 Institute of Oceanography, Minjiang University, Fuzhou 350108, Fujian, China.

***Correspondence:** Haiyan Dong, cmopdhy@163.com, Institute for Translational Medicine, Fujian Medical University, 1 Xue Yuan Road, University Town, Fuzhou Fujian, China; Jingjing Xie, xiejj@xmu.edu.cn, School of Pharmaceutical Sciences, Xiamen University, Xiang'an South Road, Xiamen, China.

# These two authors contribute to this paper equally.

**Methods**

The dissociation constant (Kd) was tested by following the reported method.1 CEM cells (1×106) were incubated on ice for 0.5 h with various concentrations of Ap or G-dApR in 200 μl of binding buffer. We then washed cells 3 times with 500 μl of washing buffer, re-suspended cells in 200 μl of binding buffer for flow cytometric analysis. The dependence of fluorescent intensity of Ap/cell complex and G-dApR/cell complex on their concentration was fitted with the equation Y = BmaxX/ (Kd +X) using Sigma Plot software, and therefore Kd of Ap and G-dApR was obtained.

**Results**

The dissociation coefficient (Kd) of Ap and G-dApR. As shown in Figure S1, the Kd values of Ap and G-dApR were in the low nanomolar range (30 and 33 nM), demonstrating the strong binding of Ap and G-dApR to target CEM cells. G-dApR bound to CEM with the lower Kd, suggesting higher binding efficiency. According to the reported reference,1 the Kd value of G-dApR is good for binding target cells.

**
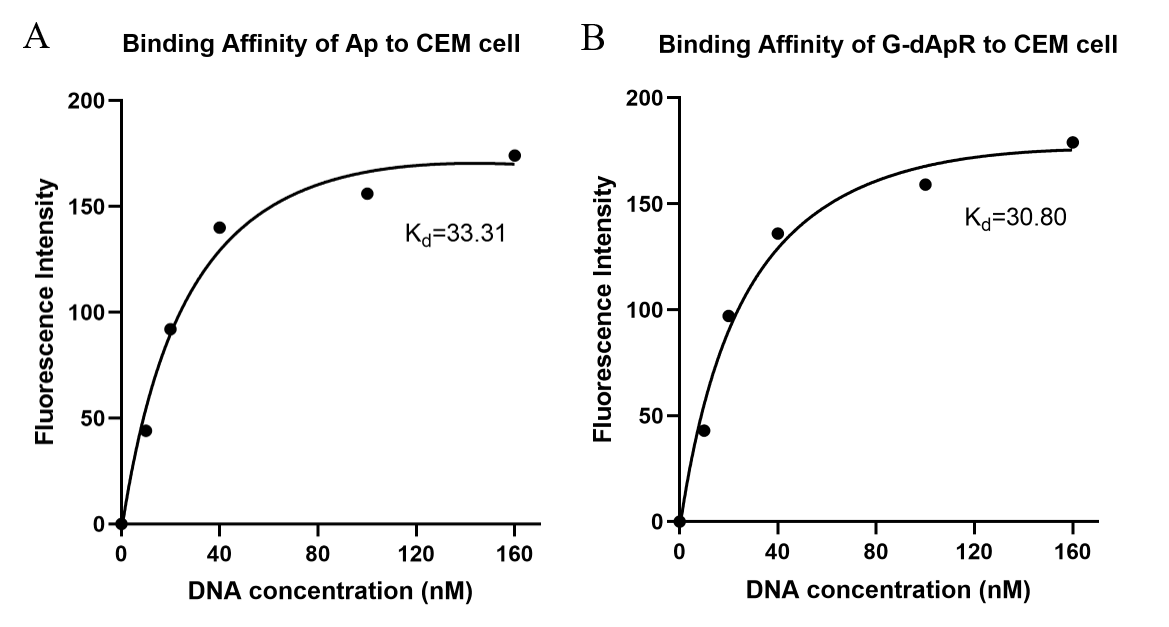
**

**Figure S1**. Dissociation constant of Ap (A) and G-dApR (B) for CEM cell.

**Reference:**

1. Li X, Zhang W, Liu L, et al. In Vitro Selection of DNA Aptamers for Metastatic Breast Cancer Cell Recognition and Tissue Imaging. *Anal Chem*, 2014. 86: 6596-6603.
